# Supplementary material for: Diversity of RNA viruses in the cosmopolitan monoxenous trypanosomatid Leptomonas pyrrhocoris
Source: PubMed Central journal article supplement (PMC10496375; doi:10.1186/s12915-023-01687-y), 2023-09-12

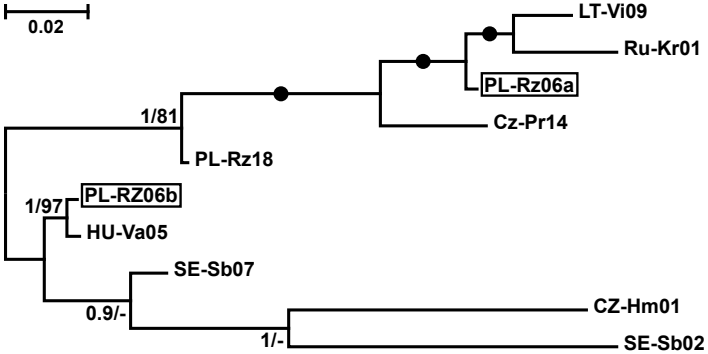

Supplement: 12915_2023_1687_MOESM4_ESM.pdf [file 12915_2023_1687_MOESM4_ESM.pdf]
